## CLINICAL INVESTIGATIONS

Anesthesiology  
83:449-458, 1995  
© 1995 American Society of Anesthesiologists, Inc.  
Lippincott-Raven Publishers

# Renal Function in Patients with High Serum Fluoride Concentrations after Prolonged Sevoflurane Anesthesia

Hideyuki Higuchi, M.D.,\* Hiroyuki Sumikura, M.D.,† Shinji Sumita, M.D.,† Shinya Arimura, M.D.,† Futoshi Takamatsu, M.D.,† Masuyuki Kanno, M.D.,‡ Tetsuo Satoh, M.D.§

**Background:** In studies of methoxyflurane-induced nephrotoxicity, renal-concentrating impairment has been observed only when serum inorganic fluoride concentrations exceed 50  $\mu\text{M}$ . Prolonged sevoflurane anesthesia can result in serum inorganic fluoride concentrations in excess of 50  $\mu\text{M}$ . The authors compared renal function after prolonged sevoflurane anesthesia with that after isoflurane anesthesia. In addition, they measured urinary excretion of N-acetyl- $\beta$ -glucosaminidase (NAG), a sensitive index of renal tubular damage, during the 3-day period after anesthesia.

**Methods:** Thirty-four healthy patients who underwent either sevoflurane (23 patients) or isoflurane (11 patients) anesthesia at a total gas flow of 6 l/min for orthopedic surgery scheduled to last at least 5 h were studied. At 16.5 h after cessation of anesthesia, patients were administered 10 units of vasopressin and urine was collected frequently thereafter for evaluation of urinary osmolality. In addition, urinary excretion of NAG was measured before and on days 1-3 after anesthesia. Based on whether peak fluoride concentrations exceeded 50  $\mu\text{M}$ , 23 patients anesthetized with sevoflurane were assigned to a sevoflurane<sub>high</sub> group ( $>50 \mu\text{M}$ ) or a sevoflurane<sub>low</sub> group ( $<50 \mu\text{M}$ ).

**Results:** The eight patients in the sevoflurane<sub>high</sub> group had a mean peak fluoride concentration of  $57.5 \pm 4.3 \mu\text{M}$ . A significant, albeit weak, inverse correlation was found between peak fluoride concentration and maximal urinary osmolality after the injection of vasopressin ( $r = -0.42$ ,  $P < 0.05$ ). Mean maximum urinary osmolality tended to be lower in the sevoflurane<sub>high</sub> group ( $681 \pm 60 \text{ mOsm/kg}$ ) than in the other two groups after administration of vasopressin, although the difference among the three groups did not quite reach a statistical significance ( $P = 0.068$ ). One patient had a transient concentrating defect (maximum urinary osmolality = 390 mOsm/kg) on day 1 after anesthesia. Urinary excretion of NAG in both the sevoflurane<sub>high</sub> and sevoflurane<sub>low</sub> groups was greater on days 2 and 3 after anesthesia than before anesthesia. The increase in urinary NAG excretion was dose related with sevoflurane, but there was no difference in results of routine laboratory renal tests on days 2 and 3 after anesthesia among the three groups.

**Conclusions:** The authors concluded that sevoflurane anesthesia results in increased serum fluoride concentration, a tendency toward decreased maximal ability to concentrate urine, and increased excretion of NAG. However, the increase in urinary NAG excretion was not indicative of clinically significant renal damage in these patients with no preexisting renal disease. (Key words: Anesthetics, volatile; isoflurane; sevoflurane. Drugs: vasopressin. Ions: fluoride. Kidney: nephrotoxicity; urinary concentrating mechanism.)

This article is accompanied by an editorial. Please see: Mazze RI, Jamison R: Renal effects of sevoflurane. ANESTHESIOLOGY 83:443-445, 1995.

\* Graduate Student in Anesthesiology, National Defense Medical College.

† Staff Anesthesiologist, Central Hospital of Self Defense Force.

‡ Chief Anesthesiologist, Central Hospital of Self Defense Force.

§ Professor and Chair of Anesthesiology, National Defense Medical College.

Received from the National Defense Medical College, Saitama, Japan, and the Central Hospital of Self Defense Force, Tokyo, Japan. Submitted for publication August 17, 1994. Accepted for publication June 5, 1995. Supported by grants from the Research Foundation of National Defense Medical College and Maruishi Pharmaceutical Company.

Address reprint requests to Dr. Higuchi: Department of Anesthesiology, National Defense Medical College, 3-2 Namiki, Tokorozawa, Saitama 359, Japan.

THE nephrotoxicity associated with serum inorganic fluoride concentrations exceeding 50  $\mu\text{M}$  after methoxyflurane anesthesia has been shown to result in impairment of renal-concentrating ability.<sup>1</sup> This threshold was determined by Cousins and Mazze<sup>1</sup> using a vasopressin test. Sevoflurane is biotransformed by hepatic microsomal enzyme P450 IIE1 with the release of inorganic fluoride,<sup>2</sup> and several studies have reported serum fluoride concentrations exceeding 50  $\mu\text{M}$  during and after sevoflurane anesthesia.<sup>3,4</sup> In these studies, however, direct assessment of renal-concentrating ability, including vasopressin tests, was not performed. To our knowledge, there are only two studies in which vasopressin tests after sevoflurane anesthesia have been performed in humans.<sup>5,6</sup> Frink *et al.*<sup>5</sup> administered des-

mopressin intranasally to volunteers before and 1 and 5 days after sevoflurane anesthesia and found no difference between preoperative and postoperative maximal urinary osmolality in subjects administered sevoflurane ( $9.5 \pm 0.1$  MAC hours). However, their mean peak fluoride concentration was  $47 \pm 3 \mu\text{M}$ , and only three of seven volunteers studied had a peak plasma fluoride concentration in excess of  $50 \mu\text{M}$ . Similarly, in our previous study, the mean peak fluoride concentration of patients undergoing sevoflurane anesthesia ( $10.6 \pm 0.9$  MAC hours) was  $41.7 \mu\text{M}$ , although the responses to vasopressin of these patients were similar to those of patients with isoflurane anesthesia.<sup>6</sup> Only one patient exhibited a peak serum concentration greater than  $50 \mu\text{M}$  in our study. Therefore, questions remain concerning the safety of sevoflurane, given that it can produce peak serum fluoride concentrations greater than  $50 \mu\text{M}$  in surgical patients. The current study was designed to evaluate the renal-concentrating ability of patients undergoing sevoflurane anesthesia whose peak serum fluoride concentrations exceeded  $50 \mu\text{M}$ . In addition, we measured urinary excretion of N-acetyl- $\beta$ -glucosaminidase (NAG), a sensitive and noninvasive indicator of drug-induced renal tubular damage, to evaluate the nephrotoxicity of sevoflurane.

### Materials and Methods

Written informed consent for participation was obtained from each patient before study after approval from our hospital ethics committee had been obtained. A total of 34 ASA physical status 1 male patients scheduled to undergo orthopedic surgery expected to last at least 5 h were studied. We selected patients scheduled for peripheral orthopedic surgery without major blood loss, such as knee ligament reconstruction (tables 1 and 2). A tourniquet was inflated during the operation when the surgical site was in an extremity. Patients with abnormal renal function were excluded; normal renal function was confirmed by routine laboratory renal tests, overnight urine-concentrating test, and determination of urinary NAG excretion. Patients were assigned to receive either sevoflurane (23 patients) or isoflurane (11 patients) anesthesia. Thirty minutes after receiving an intramuscular injection of atropine (0.5 mg) and midazolam (0.08 mg/kg), each patient received an intravenous injection of thiopental (3–5 mg/kg) and succinylcholine (1 mg/kg) to facilitate tracheal intubation. A radial arterial catheter was inserted to monitor arterial blood pressure and to obtain blood

samples for analysis of arterial blood gases and serum inorganic fluoride concentrations. An intraurethral catheter was inserted to facilitate measurement of urinary output. Anesthesia was maintained with sevoflurane or isoflurane, air, and oxygen ( $\text{FiO}_2 = 0.3$ ) at a total gas flow of 6 l/min. A semiclosed-circle system with a soda lime canister (Wakolime; Wako Pure Chemical, Osaka, Japan) was used to absorb carbon dioxide. The volatile anesthetic was administered *via* a Penlon vaporizer (PPV  $\Sigma$ ; Penlon, Abingdon, United Kingdom) or a Muraco vaporizer (Forawic; Muraco Medical, Tokyo, Japan). Anesthesia was maintained for at least 300 min, even if surgery was completed earlier than anticipated. Ventilation was assisted or controlled to maintain carbon dioxide tension at 40 mmHg and arterial oxygen tension greater than 100 mmHg. End-tidal concentrations of sevoflurane or isoflurane were analyzed with a Capnomac Ultima gas analyzer (Capnomac; Datex, Helsinki, Finland), which was calibrated immediately before each study using a cylinder that contained a mixture of gases of known concentrations. The MAC hours for sevoflurane and isoflurane exposures were each calculated from the percent anesthetic concentration and the duration of anesthetic exposure. The MAC values were 2.05% for sevoflurane<sup>7</sup> and 1.15% for isoflurane.<sup>8</sup> Anesthetic concentration was adjusted by the anesthesiologist to maintain systemic arterial blood pressure within  $\pm 20\%$  of baseline.

Serum inorganic fluoride concentration was measured before anesthesia, at 1 h after initiation of anesthesia and then every 2 h during anesthesia, and at 0, 1, 2, 3, 6, 14, 16, 20, 40, and 64 h after cessation of anesthesia. Lactated Ringer's solution was administered  $5\text{--}6 \text{ ml} \cdot \text{kg}^{-1} \cdot \text{h}^{-1}$  during anesthesia and  $2 \text{ ml} \cdot \text{kg}^{-1} \cdot \text{h}^{-1}$  for 16 h after cessation of anesthetic exposure. Thirty minutes after administration of intravenous fluids had been completed—that is, 16.5 h after the end of anesthetic exposure—each patient received a subcutaneous injection of 10 units of aqueous vasopressin, urine was collected every 30 min for 4 h, and urinary osmolality was determined to evaluate renal-concentrating ability. During vasopressin testing, each patient's oral intake was restricted.

Urine collection began 24 h before anesthesia and continued until 72 h after cessation of anesthesia. Before operation and on days 2 and 3 after anesthesia, overnight urine-concentrating ability was determined by restricting oral intake beginning at 8 PM and obtaining one urine specimen at 6 AM the next morning and another 1 h later. The osmolality of the 7 AM specimen

Table 1. Clinical Characteristics of

| n  | Age (yr) | Height (cm) | Weight (kg) | Anesthetic time (min) | MAC hours | Mean end-tidal anesthetic concentration | Blood loss (ml) | Amounts of fluid administered during anesthesia ( $\text{ml} \cdot \text{kg}^{-1}$ ) | Surgical site and procedure    | Knee (ligament reconstruction)† | Leg (lengthening of lower legs)† | Hand/arm (nerve transfer)† | Spine (enlargement of spinal canal)† | Hip (osteotomy) | Shoulder (arthroplasty) |
|----|----------|-------------|-------------|-----------------------|-----------|-----------------------------------------|-----------------|--------------------------------------------------------------------------------------|--------------------------------|---------------------------------|----------------------------------|----------------------------|--------------------------------------|-----------------|-------------------------|
| 23 | 48       | 172         | 70          | 180                   | 1.5       | 2.05                                    | 100             | 100                                                                                  | Knee (ligament reconstruction) | +                               | +                                | +                          | +                                    | +               | +                       |
| 11 | 48       | 172         | 70          | 180                   | 1.5       | 1.15                                    | 100             | 100                                                                                  | Knee (ligament reconstruction) | +                               | +                                | +                          | +                                    | +               | +                       |

Values are mean  $\pm$  SE.

\*  $P < 0.01$ , sevoflurane-high, versus isoflurane-low.

† Tourniquet application.

was determined. Clinical lab formed immediately before a 48, and 72 h after initiation

All patients received antibiotic specific antibiotic was determined. geon, who was not involved received aminoglycosides (3 alosporins and one patient antibiotics were administered from immediately after the day 2 or 3 after anesthesia, fofiam was administered orally patients (patients 17 and 2 titam prophylactically (600 operation because of 4 punct

Serum inorganic fluoride ion-selective fluoride electrode (Orion Research, Boston, MA) molality were measured with (Advanced Instruments, Nor point depression test. Urina mined by spectrophotometry sulfonphthaleinyl N-ac described by Noto *et al.*<sup>9</sup> U expressed relative to creatin of NAG activity/g  $\cdot$  creatini normal range of this para  $\cdot$  creatinine.



# RENAL FUNCTION AFTER PROLONGED SEVOFLURANE ANESTHESIA

**Table 1. Clinical Characteristics of Patients Studied**

|                                                                                    | Isoflurane | Sevoflurane <sub>high</sub> | Sevoflurane <sub>low</sub> |
|------------------------------------------------------------------------------------|------------|-----------------------------|----------------------------|
| n                                                                                  | 11         | 8                           | 15                         |
| Age (yr)                                                                           | 28 ± 3     | 24 ± 1                      | 29 ± 2                     |
| Height (cm)                                                                        | 168 ± 3    | 170 ± 2                     | 170 ± 2                    |
| Weight (kg)                                                                        | 68 ± 4     | 75 ± 4                      | 69 ± 3                     |
| Anesthetic time (min)                                                              | 402 ± 18   | 458 ± 8                     | 435 ± 19                   |
| MAC hours                                                                          | 9.2 ± 1.3  | 14.0 ± 0.7*                 | 9.9 ± 0.7                  |
| Mean end-tidal anesthetic concentration (MAC)                                      | 1.3 ± 0.5  | 1.8 ± 0.3*                  | 1.4 ± 0.2                  |
| Blood loss (ml)                                                                    | 120 ± 29   | 67 ± 25                     | 156 ± 69                   |
| Amounts of fluid administered during and after anesthesia (ml · kg <sup>-1</sup> ) | 68.0 ± 1.2 | 66.6 ± 1.7                  | 68.7 ± 1.9                 |
| Surgical site and procedure                                                        |            |                             |                            |
| Knee (ligament reconstruction)†                                                    | 6          | 8                           | 9                          |
| Leg (lengthening of lower legs)†                                                   | 1          | 0                           | 1                          |
| Hand/arm (nerve transfer)†                                                         | 1          | 0                           | 1                          |
| Spine (enlargement of spinal canal)                                                | 1          | 0                           | 2                          |
| Hip (osteotomy)                                                                    | 0          | 0                           | 1                          |
| Shoulder (arthroplasty)                                                            | 2          | 0                           | 1                          |

Values are mean ± SE.

\*  $P < 0.01$ , sevoflurane<sub>high</sub> versus isoflurane.;  $P < 0.05$ , sevoflurane<sub>high</sub> versus sevoflurane<sub>low</sub>.

† Tourniquet application.

was determined. Clinical laboratory studies were performed immediately before anesthesia and repeated 24, 48, and 72 h after initiation of anesthesia.

All patients received antibiotics perioperatively. The specific antibiotic was determined by the patient's surgeon, who was not involved in the study. No patient received aminoglycosides (33 patients received cephalosporins and one patient aspoxicillin; table 2). Antibiotics were administered intravenously twice a day from immediately after the induction of anesthesia to day 2 or 3 after anesthesia, and thereafter 600 mg cefotiam was administered orally for 3–5 days. Only two patients (patients 17 and 22; table 2) received cefotiam prophylactically (600 mg) for 4 or 5 days before operation because of a puncture wound of the knee.

Serum inorganic fluoride ion was measured with an ion-selective fluoride electrode and Ionalyzer No. 901 (Orion Research, Boston, MA). Serum and urinary osmolality were measured with a Model 3D3 osmometer (Advanced Instruments, Norwood, MA) using a freezing point depression test. Urinary NAG activity was determined by spectrophotometric assay using sodio *m*-cresolsulfonphthaleinyl *N*-acetyl- $\beta$ -D-glucosaminide as described by Noto *et al.*<sup>9</sup> Urine enzyme activity was expressed relative to creatinine concentration as units of NAG activity/g · creatinine. In our hospital, the normal range of this parameter is 0.04–2.85 U/g · creatinine.

Values are presented as mean ± SE. Subjects receiving sevoflurane were divided into two groups based on whether peak inorganic fluoride concentration exceeded 50  $\mu$ M (sevoflurane<sub>high</sub> group) or was less than 50  $\mu$ M (sevoflurane<sub>low</sub> group). Differences between the three study groups were analyzed with ANOVA using Scheffé's F procedure.  $P$  values less than 0.05 were considered to indicate statistical significance. A power analysis was performed to determine the possibility of type II error with the JMP statistical software package (SAS Institute, Inc., Cary, NC) for Macintosh computers.

## Results

Eight patients receiving sevoflurane had a peak fluoride concentration greater than 50  $\mu$ M. Therefore, there were 8 patients in the sevoflurane<sub>high</sub> group and 15 in the sevoflurane<sub>low</sub> group. Tables 1 and 2 list the clinical characteristics of the patients studied. There were no hypotensive episodes in any of the patients. The three groups of patients were similar in clinical characteristics, with the exception of MAC hours. Mean MAC hours in the sevoflurane<sub>high</sub> group were significantly greater than in each of the other two groups ( $P < 0.01$ , sevoflurane<sub>high</sub> vs. isoflurane;  $P < 0.05$ , sevoflurane<sub>high</sub> vs. sevoflurane<sub>low</sub>).

Urinary NAG excretion can increase in a variety of circumstances, including after the administration of

### Table 2. Results for Individual Patients of Each Group

| Group                      | Patient No.                | Age (yr) | Duration of Anesthesia (min) | MAC hour  | Peak Fluoride Level (μM) | Duration Greater than 50 μM (h) | Surgical Site      | Surgical Procedure          | Duration of Tourniquet Inflation (min) | Amounts of Fluid Administered during duration of Anesthesia (ml) |          | Urinary Osmolality after Injection of Vasopressin (mOsm/kg) |             | Urinary NAG Creatinine Ratio (U/g · creatinine per 24 h) |          |          | Urinary Osmolality after Overnight Dehydration (mOsm/kg) |              |          | Antibiotic Administered |
|----------------------------|----------------------------|----------|------------------------------|-----------|--------------------------|---------------------------------|--------------------|-----------------------------|----------------------------------------|------------------------------------------------------------------|----------|-------------------------------------------------------------|-------------|----------------------------------------------------------|----------|----------|----------------------------------------------------------|--------------|----------|-------------------------|
|                            |                            |          |                              |           |                          |                                 |                    |                             |                                        | PRE                                                              | MAX      | PRE                                                         | MAX         | PRE                                                      | POD2     | POD3     |                                                          |              |          |                         |
|                            |                            |          |                              |           |                          |                                 |                    |                             |                                        |                                                                  |          |                                                             |             |                                                          |          |          |                                                          |              |          |                         |
| Isoflurane                 | 1                          | 26       | 455                          | 11.2      | 4.7                      |                                 | Knee               | Ligament reconstruction     | 164                                    | 5,240                                                            | 260      | 790                                                         | 2.15        | 1.03                                                     | 805      | 850      | 1,000                                                    | Cefotiam     |          |                         |
|                            | 2                          | 20       | 475                          | 11.6      | 3.2                      |                                 | Knee               | Ligament reconstruction     | 156                                    | 3,790                                                            | 295      | 650                                                         | 1.09        | 1.50                                                     | 845      | 855      | 830                                                      | Cefotiam     |          |                         |
|                            | 3                          | 32       | 395                          | 12.1      | 6.3                      |                                 | Knee               | Ligament reconstruction     | 226                                    | 5,350                                                            | 452      | 728                                                         | 0.56        | 3.97                                                     | 807      | 808      | 900                                                      | Cefotiam     |          |                         |
|                            | 4                          | 31       | 440                          | 12.6      | 7.4                      |                                 | Leg                | Lengthening of leg          | 186                                    | 4,050                                                            | 242      | 760                                                         | 1.54        | 1.85                                                     | 820      | 840      | 825                                                      | Cefotiam     |          |                         |
|                            | 5                          | 21       | 350                          | 4.1       | 6.3                      |                                 | Shoulder           | Arthroplasty                |                                        | 3,800                                                            | 530      | 1,125                                                       | 2.24        | 3.64                                                     | 830      | 850      | 800                                                      | Cefotiam     |          |                         |
|                            | 6                          | 28       | 355                          | 8.1       | 6.8                      |                                 | Knee               | Ligament reconstruction     | 198                                    | 5,020                                                            | 385      | 890                                                         | 1.29        | 2.05                                                     | 900      | 810      | 850                                                      | Cefotiam     |          |                         |
|                            | 7                          | 33       | 300                          | 1.6       | 4.7                      |                                 | Spine              | Enlargement of spinal canal |                                        | 3,790                                                            | 795      | 890                                                         | 1.4         | 2.68                                                     | 830      | 914      | 820                                                      | Cefotiam     |          |                         |
|                            | 8                          | 21       | 395                          | 7.9       | 7.4                      |                                 | Knee               | Ligament reconstruction     | 157                                    | 5,430                                                            | 650      | 860                                                         | 0.05        | 2.13                                                     | 1,125    | 930      | 1,100                                                    | Cefotiam     |          |                         |
|                            | 9                          | 51       | 415                          | 9.2       | 4.2                      |                                 | Arm                | Nerve transfer              |                                        | 3,750                                                            | 306      | 749                                                         | 1.39        | 3.91                                                     | 803      | 810      | 861                                                      | Cefotiam     |          |                         |
|                            | 10                         | 21       | 490                          | 16.2      | 5.3                      |                                 | Knee               | Ligament reconstruction     | 229                                    | 4,060                                                            | 480      | 780                                                         | 1.18        | 1.80                                                     | 1,180    | 948      | 1,200                                                    | Cefotiam     |          |                         |
|                            | 11                         | 22       | 350                          | 6.5       | 4.0                      |                                 | Shoulder           | Arthroplasty                | 188 ± 12                               | 6,070                                                            | 450      | 790                                                         | 0.04        | 2.23                                                     | 880      | 865      | 811                                                      | Cefotiam     |          |                         |
| Mean ± SE                  |                            | 28 ± 3   | 402 ± 18                     | 9.2 ± 1.3 | 5.5 ± 0.4                |                                 |                    |                             |                                        | 4,577 ± 257                                                      | 441 ± 52 | 816 ± 37                                                    | 1.17 ± 0.02 | 2.24 ± 0.30                                              | 893 ± 40 | 865 ± 15 | 909 ± 40                                                 |              |          |                         |
| Sevoflurane <sup>low</sup> | 12                         | 22       | 425                          | 13.0      | 51.9                     | 1.1                             | Knee               | Ligament reconstruction     | 161                                    | 5,350                                                            | 275      | 567                                                         | 1.10        | 2.47                                                     | 1,079    | 827      | 880                                                      | Cefotiam     |          |                         |
|                            | 13                         | 29       | 465                          | 14.2      | 86.8                     | 14.3                            | Knee               | Ligament reconstruction     | 267                                    | 4,870                                                            | 261      | 708                                                         | 2.19        | 20.08                                                    | 940      | 872      | 970                                                      | Cefotiam     |          |                         |
|                            | 14                         | 23       | 480                          | 15.2      | 52.6                     | 3.7                             | Knee               | Ligament reconstruction     | 188                                    | 4,460                                                            | 291      | 740                                                         | 1.29        | 6.89                                                     | 804      | 832      | 826                                                      | Cefotiam     |          |                         |
|                            | 15                         | 22       | 465                          | 15.7      | 50.9                     | 3.5                             | Knee               | Ligament reconstruction     | 173                                    | 5,700                                                            | 490      | 765                                                         | 2.35        | 6.22                                                     | 1,018    | 894      | 1,050                                                    | Aspoxicillin |          |                         |
|                            | 16                         | 26       | 470                          | 11.8      | 56.3                     | 5.9                             | Knee               | Ligament reconstruction     | 197                                    | 5,480                                                            | 830      | 980                                                         | 2.03        | 5.20                                                     | 880      | 926      | 1,050                                                    | Cefmetazole  |          |                         |
|                            | 17                         | 23       | 425                          | 16.2      | 56.8                     | 5.8                             | Knee               | Ligament reconstruction     | 192                                    | 4,610                                                            | 130      | 390                                                         | 2.09        | 6.30                                                     | 815      | 846      | 963                                                      | Cefotiam     |          |                         |
|                            | 18                         | 20       | 480                          | 10.9      | 50.9                     | 0.4                             | Knee               | Ligament reconstruction     | 288                                    | 3,690                                                            | 550      | 630                                                         | 1.25        | 6.18                                                     | 852      | 845      | 900                                                      | Cefotiam     |          |                         |
|                            | 19                         | 27       | 450                          | 15.1      | 53.7                     | 2.1                             | Knee               | Ligament reconstruction     | 175                                    | 5,550                                                            | 474      | 670                                                         | 0.34        | 2.37                                                     | 1,120    | 827      | 925                                                      | Cefotiam     |          |                         |
|                            | Mean ± SE                  |          | 24 ± 1                       | 458 ± 8   | 14.0 ± 0.7               | 57.5 ± 4.3                      | 4.6 ± 1.6          |                             | 210 ± 18                               | 4,964 ± 243                                                      | 413 ± 78 | 681 ± 60                                                    | 1.58 ± 0.25 | 7.06 ± 2.07                                              | 939 ± 43 | 859 ± 13 | 946 ± 28                                                 |              |          |                         |
|                            | Sevoflurane <sup>low</sup> | 20       | 19                           | 310       | 5.2                      | 30.6                            |                    | Knee                        | Ligament reconstruction                | 172                                                              | 3,220    | 635                                                         | 770         | 1.55                                                     | 2.94     | 930      | 950                                                      | 1,000        | Cefotiam |                         |
|                            |                            | 21       | 24                           | 440       | 8.6                      | 31.6                            |                    | Knee                        | Ligament reconstruction                | 155                                                              | 4,480    | 225                                                         | 735         | 1.98                                                     | 7.62     | 820      | 865                                                      | 925          | Cefotiam |                         |
| 22                         |                            | 30       | 440                          | 11.9      | 41.1                     |                                 | Knee               | Ligament reconstruction     | 82                                     | 5,640                                                            | 430      | 780                                                         | 1.63        | 5.69                                                     | 1,050    | 1,000    | 950                                                      | Cefotiam     |          |                         |
| 23                         |                            | 50       | 380                          | 8.3       | 45.0                     |                                 | Spine              | Enlargement of spinal canal |                                        | 4,950                                                            | 420      | 940                                                         | 0.40        | 5.49                                                     | 800      | 853      | 760                                                      | Cefotiam     |          |                         |
| 24                         |                            | 24       | 480                          | 13.9      | 46.8                     |                                 | Knee               | Ligament reconstruction     | 149                                    | 4,790                                                            | 370      | 735                                                         | 1.70        | 2.42                                                     | 857      | 861      | 893                                                      | Cefmetazole  |          |                         |
| 25                         |                            | 22       | 530                          | 14.3      | 44.7                     |                                 | Knee               | Ligament reconstruction     | 160                                    | 5,400                                                            | 321      | 804                                                         | 1.13        | 2.55                                                     | 983      | 947      | 868                                                      | Cefotiam     |          |                         |
| 26                         |                            | 38       | 460                          | 11.3      | 40.5                     |                                 | Knee               | Ligament reconstruction     | 150                                    | 4,410                                                            | 320      | 840                                                         | 1.34        | 2.30                                                     | 802      | 816      | 860                                                      | Cefotiam     |          |                         |
| 27                         |                            | 33       | 470                          | 10.3      | 29.5                     |                                 | Knee               | Ligament reconstruction     | 145                                    | 3,690                                                            | 369      | 845                                                         | 0.76        | 2.21                                                     | 811      | 908      | 899                                                      | Cefotiam     |          |                         |
| 28                         |                            | 31       | 365                          | 8.4       | 36.8                     |                                 | Spine              | Enlargement of spinal canal |                                        | 4,610                                                            | 611      | 894                                                         | 1.00        | 3.34                                                     | 1,292    | 863      | 825                                                      | Cefotiam     |          |                         |
| 29                         |                            | 20       | 320                          | 6.3       | 19.5                     |                                 | Knee               | Ligament reconstruction     | 205                                    | 4,650                                                            | 722      | 1,158                                                       | 2.15        | 1.84                                                     | 1,188    | 856      | 1,010                                                    | Cefmetazole  |          |                         |
| 30                         |                            | 27       | 485                          | 9.5       | 41.1                     |                                 | Knee               | Ligament reconstruction     | 205                                    | 5,000                                                            | 430      | 783                                                         | 1.39        | 1.98                                                     | 972      | 867      | 909                                                      | Cefotiam     |          |                         |
| 31                         | 44                         | 420      | 10.2                         | 33.2      |                          | Hip                             | Osteotomy          |                             | 5,750                                  | 620                                                              | 650      | 1.08                                                        | 2.31        | 900                                                      | 816      | 816      | Cefotiam                                                 |              |          |                         |
| 32                         | 19                         | 425      | 6.6                          | 33.5      |                          | Shoulder                        | Arthroplasty       |                             | 4,060                                  | 370                                                              | 810      | 0.94                                                        | 1.91        | 1,220                                                    | 1,000    | 1,250    | Cefotiam                                                 |              |          |                         |
| 33                         | 27                         | 580      | 13.7                         | 39.5      |                          | Hand                            | Nerve transfer     | 405                         | 4,900                                  | 470                                                              | 710      | 1.70                                                        | 5.50        | 812                                                      | 850      | 1,016    | Cefotiam                                                 |              |          |                         |
| 34                         | 25                         | 425      | 10.5                         | 37.9      |                          | Leg                             | Lengthening of leg | 270                         | 5,240                                  | 305                                                              | 705      | 1.93                                                        | 7.18        | 860                                                      | 820      | 896      | Cefotiam                                                 |              |          |                         |
| Mean ± SE                  |                            | 29 ± 2   | 435 ± 19                     | 9.9 ± 0.7 | 36.8 ± 1.9               |                                 |                    | 191 ± 26                    | 4,719 ± 179                            | 441 ± 37                                                         | 811 ± 32 | 1.38 ± 0.13                                                 | 3.68 ± 0.52 | 953 ± 42                                                 | 892 ± 15 | 926 ± 30 |                                                          |              |          |                         |

PRE = preadministration or preanesthesia; MAX = maximum urinary osmolality after injection of vasopressin or maximum value in urinary NAG excretion during the 3-day period after anesthesia; POD2 = 2 days postanesthesia; POD3 = 3 days postanesthesia.

RENAL FUNCTION AFTER

various types of antibiotics<sup>10</sup> we analyzed the data separately for cephalosporins and for isoflurane, 7 for sevoflurane, and 7 for isoflurane<sub>low</sub> to reduce the chances of confounding by substances that might influence the duration of total anesthesia. Neither the duration of total anesthesia nor the daily dose of cephalosporins differed significantly among the three groups of patients; therefore, there was no significant difference in the hours among the three groups. The mean serum fluoride concentration in the control group was  $55.8 \pm 3.4 \mu\text{mol/L}$  and the mean concentration of anesthesia (fig. 1) was  $4.6 \pm 1.6 \mu\text{mol/L}$ . The fluoride concentrations in the sevoflurane group were  $4.6 \pm 1.6 \mu\text{mol/L}$ . The fluoride concentration in the isoflurane group was  $1.9 \mu\text{mol/L}$ , observed at the end of anesthesia. The corresponding value in the isoflurane<sub>low</sub> group (11) was  $4.8 \pm 0.5 \mu\text{mol/L}$ , observed at the end of anesthesia (fig. 1).

The results of clinical laboratory tests for the three groups are shown in table 4. There were no differences in laboratory be-

Table 3. Clinical Characteristics of Patients Receiving Cephalosporins and Underwent

|                                                                                         | Isosurane      |
|-----------------------------------------------------------------------------------------|----------------|
| N                                                                                       | 7              |
| Anesthetic time (min)                                                                   | 420 $\pm$ 19   |
| MAC hours                                                                               | 11.4 $\pm$ 1.1 |
| Mean end-tidal anesthetic concentration (MAC)                                           | 1.6 $\pm$ 0.3  |
| Duration of tourniquet inflation (min)                                                  | 180 $\pm$ 12   |
| Daily dose administered from after induction of anesthesia to 3 days postanesthesia (g) | 2.4 $\pm$ 0.3  |
| Cephalosporins                                                                          |                |
| Cefotiam                                                                                | 6              |
| Cefoxitin                                                                               | 1              |
| Cefmetazole                                                                             | 0              |

Values are mean  $\pm$  SE.

# RENAL FUNCTION AFTER PROLONGED SEVOFLURANE ANESTHESIA

various types of antibiotics<sup>10</sup> and surgery.<sup>11</sup> Therefore, we analyzed the data separately for 25 patients who received cephalosporins and underwent tourniquet inflation (7 for isoflurane, 7 for sevoflurane<sub>high</sub>, and 11 for sevoflurane<sub>low</sub>) to reduce the variety of circumstances that might influence urinary NAG excretion. Neither the duration of tourniquet inflation nor the daily dose of cephalosporins administered differed significantly among the three groups. Among these 25 patients, there was no significant difference in mean MAC hours among the three groups (table 3). The mean peak serum fluoride concentration in the sevoflurane<sub>high</sub> group was  $55.8 \pm 3.4$   $\mu\text{mol/l}$ , observed 1 h after cessation of anesthesia (fig. 1). The mean time that peak fluoride concentrations exceeded 50  $\mu\text{mol/l}$  in this group was  $4.6 \pm 1.6$  h. The mean peak serum fluoride concentration in the sevoflurane<sub>low</sub> group was  $36.8 \pm 1.9$   $\mu\text{mol/l}$ , observed at cessation of anesthesia (fig. 1). The corresponding value in the isoflurane group (n = 11) was  $4.8 \pm 0.5$   $\mu\text{mol/l}$ , observed 16 h after cessation of anesthesia (fig. 1).

The results of clinical laboratory studies for the three groups are shown in table 4. The three groups did not differ in laboratory baseline values, and no abnormal

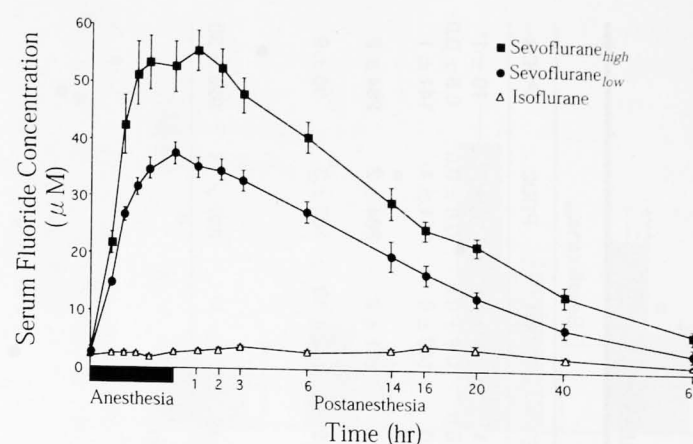

**Fig. 1.** Mean serum inorganic fluoride ion concentrations during and after sevoflurane or isoflurane anesthesia. The sevoflurane<sub>high</sub> group (n = 8) consisted of patients with a peak serum fluoride concentration in excess of 50  $\mu\text{mol/l}$  after sevoflurane anesthesia, and the sevoflurane<sub>low</sub> group (n = 15) consisted of patients whose peak fluoride concentrations were below 50  $\mu\text{mol/l}$  after sevoflurane anesthesia. The mean peak value in the sevoflurane<sub>high</sub> group was  $55.8 \pm 3.4$   $\mu\text{mol/l}$  (1 h postanesthesia), in the sevoflurane<sub>low</sub> group  $36.8 \pm 1.9$   $\mu\text{mol/l}$  (at cessation of anesthesia), and in the isoflurane group (n = 11)  $4.8 \pm 0.5$   $\mu\text{mol/l}$  (16 h postanesthesia). Data points represent mean  $\pm$  SE.

changes in values of renal function studies were noted during the study period.

Neither urinary osmolality before vasopressin administration nor the total amounts of fluids administered during and after anesthesia differed among the three groups (tables 1 and 2). The mean maximum urinary osmolalities after injection of vasopressin in the isoflurane, sevoflurane<sub>high</sub>, and sevoflurane<sub>low</sub> group were  $816 \pm 37$ ,  $681 \pm 60$ , and  $811 \pm 32$  mOsm/kg, respectively (table 2, fig. 2). Although mean maximum urinary osmolality in the sevoflurane<sub>high</sub> group tended to be lower than that in each of the other two groups, the overall difference marginally failed on one-way ANOVA to reach statistical significance ( $P = 0.068$ , statistical power = 53%). Power analysis indicated that at least four additional patients were required to obtain a significant difference with the same standard errors and structural results as the current sample. The two patients who exhibited the lowest and second-lowest maximum urinary osmolality belonged to the sevoflurane<sub>high</sub> group (patients 12 and 17; table 2, fig. 2). The lowest maximal osmolality in the group of all patients was 390 mOsm/kg, in a patient given sevoflurane whose peak serum fluoride concentration was 56.8  $\mu\text{mol/l}$  and whose fluoride concentration remained greater than 50  $\mu\text{mol/l}$  for 6 h (patient 17). There was a significant, albeit weak, inverse correlation between

**Table 3.** Clinical Characteristics of Patients Who Received Cephalosporins and Underwent Tourniquet Inflation

|                                                                                         | Isoflurane     | Sevoflurane <sub>high</sub> | Sevoflurane <sub>low</sub> |
|-----------------------------------------------------------------------------------------|----------------|-----------------------------|----------------------------|
| N                                                                                       | 7              | 7                           | 11                         |
| Anesthetic time (min)                                                                   | 429 $\pm$ 19   | 456 $\pm$ 9                 | 449 $\pm$ 24               |
| MAC hours                                                                               | 11.4 $\pm$ 1.1 | 13.8 $\pm$ 0.7              | 10.5 $\pm$ 0.9             |
| Mean end-tidal anesthetic concentration (MAC)                                           | 1.6 $\pm$ 0.3  | 1.8 $\pm$ 0.3               | 1.4 $\pm$ 0.3              |
| Duration of tourniquet inflation (min)                                                  | 188 $\pm$ 12   | 210 $\pm$ 18                | 191 $\pm$ 26               |
| Daily dose administered from after induction of anesthesia to 3 days postanesthesia (g) | 2.4 $\pm$ 0.3  | 1.9 $\pm$ 0.2               | 2.2 $\pm$ 0.3              |
| Cephalosporins                                                                          |                |                             |                            |
| Cefotiam                                                                                | 6              | 6                           | 9                          |
| Cefoxitin                                                                               | 1              | 0                           | 1                          |
| Cefmetazole                                                                             | 0              | 1                           | 1                          |

Values are mean  $\pm$  SE.



Table 4. Results of Laboratory Tests of Renal Function for Patients with Prolonged Isoflurane or Sevoflurane Anesthesia

|                                                          | Isoflurane |           |           | Sevoflurane <sub>high</sub> |           |           | Sevoflurane <sub>low</sub> |           |           |           |           |           |
|----------------------------------------------------------|------------|-----------|-----------|-----------------------------|-----------|-----------|----------------------------|-----------|-----------|-----------|-----------|-----------|
|                                                          | PRE        | POD1      | POD2      | POD3                        | PRE       | POD1      | POD2                       | POD3      | PRE       | POD1      | POD2      | POD3      |
| BUN (mg/ml)                                              | 14 ± 1     | 9 ± 0*    | 9 ± 1*    | 9 ± 1†                      | 13 ± 1    | 9 ± 1*    | 10 ± 1*                    | 11 ± 1†   | 13 ± 1    | 8 ± 1†    | 10 ± 1*   | 10 ± 1*   |
| Creatinin (mg/ml)                                        | 0.9 ± 0.1  | 0.9 ± 0.1 | 0.8 ± 0.1 | 0.9 ± 0.1                   | 1.0 ± 0.0 | 0.9 ± 0.0 | 0.9 ± 0.0                  | 0.9 ± 0.0 | 0.9 ± 0.0 | 0.8 ± 0.0 | 0.8 ± 0.0 | 0.8 ± 0.0 |
| Sodium (mm)                                              | 142 ± 1    | 140 ± 1   | 140 ± 1   | 142 ± 1                     | 142 ± 1   | 140 ± 1   | 140 ± 1                    | 141 ± 1   | 141 ± 0   | 140 ± 0   | 141 ± 1   | 141 ± 1   |
| Serum osmolality (mOsm/kg)                               | 281 ± 5    | 279 ± 3   | 282 ± 4   | 285 ± 3                     | 286 ± 3   | 282 ± 5   | 281 ± 4                    | 278 ± 2   | 286 ± 2   | 281 ± 2   | 284 ± 2   | 284 ± 2   |
| Creatinine clearance (ml/min)                            | 95 ± 3     | 105 ± 5   | 99 ± 8    | 90 ± 8                      | 89 ± 2    | 116 ± 8   | 114 ± 13                   | 92 ± 10   | 93 ± 2    | 112 ± 10  | 103 ± 3   | 96 ± 9    |
| Urinary osmolality after overnight dehydration (mOsm/kg) | 893 ± 40   |           | 865 ± 15  | 909 ± 40                    | 939 ± 43  |           | 859 ± 13                   | 946 ± 28  | 953 ± 42  |           | 892 ± 15  | 926 ± 30  |

PRE = preanesthesia; POD1 = 1 day postanesthesia; POD2 = 2 days postanesthesia; POD3 = 3 days postanesthesia; BUN = blood urea nitrogen.

Values are mean ± SE; n = 11 for the isoflurane group, 8 for the sevoflurane<sub>high</sub> group, and 15 for the sevoflurane<sub>low</sub> group.

\*  $P < 0.05$  compared to preanesthetic value.

†  $P < 0.01$  compared to preanesthetic value.

peak fluoride concentration and maximal urinary osmolality after the injection of vasopressin in patients who received sevoflurane ( $r = -0.42$ ,  $P < 0.05$ ).

All patients were able to concentrate urine effectively after overnight dehydration (table 2). In the three groups, urinary osmolality did not differ on day 2 or 3 after anesthesia from the value obtained before anesthesia. In addition, there were no significant differences in overnight urine-concentrating ability among the three groups. Urinary osmolalities after overnight dehydration of the one patient who exhibited impairment of renal-concentrating ability (patient 17) was 815 mOsm/kg before anesthesia, 846 mOsm/kg on day 2 after anesthesia, and 963 mOsm/kg on day 3 after anesthesia (table 2).

The results of measurement of urinary excretion of NAG for the three groups before and 1, 2, and 3 days after anesthesia are shown in fig 3. In the isoflurane group, there was no difference between urinary excretion of NAG during the 3-day period after anesthesia and that before anesthesia. Urinary excretion of NAG in the sevoflurane<sub>high</sub> and sevoflurane<sub>low</sub> groups was significantly greater on days 2 and 3 after anesthesia than before anesthesia, and was also significantly greater than that of the isoflurane group on day 2 after anesthesia. The maximum urinary excretion of NAG during the 3-day postoperative period for sevoflurane<sub>high</sub> was significantly greater than that of the isoflurane group ( $P < 0.05$ ; fig. 4). This significant difference was recognized even in patients limited to those who were administered cephalosporins and underwent tourniquet inflation ( $P < 0.05$ ; fig. 4). The patient whose serum fluoride concentration was highest (86.8  $\mu\text{mol/l}$ ) had the highest maximum urinary excretion of NAG (20.08 U/g  $\cdot$  creatinine) of all patients studied (patient 13; table 1). No correlation was found between maximum urinary osmolality after injection of vasopressin and maximal urinary excretion of NAG. Urinary NAG excretion by four patients (patients 16, 23, 25, and 33; table 2) was measured until day 7 after anesthesia. In these cases, urinary NAG excretion after anesthesia peaked by postanesthesia day 3, and urinary NAG subsequently returned to normal levels by day 6 after anesthesia (values for these four patients returned to normal levels by days 4, 6, 4, and 3 after anesthesia, respectively).

## Discussion

The renal effect of anesthetics would be best studied in volunteers not subjected to surgery.<sup>12</sup> However, we

## RENAL FUNCTION AFTER

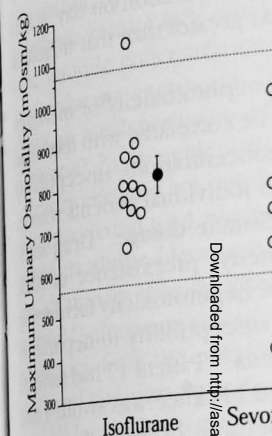

Fig. 2. Maximum urinary osmolality in each patient (open circles) after the injection of vasopressin was administered 1 hour after anesthesia. Closed circles and error bars represent maximal urinary osmolalities in the sevoflurane<sub>low</sub> and sevoflurane<sub>high</sub> groups were (390–980), and 811 ± 32 (630–1050). The dotted line represents the mean ± 1 SD of the isoflurane group. Differences were found among

believe the effects of surgical anesthesia on renal function in the current study were probably the same as those in the previous study because the sites of surgery in the current study were almost always in the extremities, and the effects were negligible. In addition, we used a stable hemodynamic anesthetic, propofol, which permits a maintenance concentration of 7%, we were able to achieve concentrations of sevoflurane in our previous study. We were able to study patients whose peak inorganic fluoride concentration exceeded 50  $\mu\text{mol/l}$ .

The total dosage of anesthesia in the current study was significantly greater than in the previous study. However, patients who underwent tourniquet inflation were not considered, no significant differences were found among the three groups in total anesthetic MAC hours in the current study. Although MAC hours in the current study tended to be greater than in the previous study, it is unlikely that poor renal performance in the sevoflurane<sub>high</sub> group, because of the high anesthetic concentrations to which patients were exposed, was the cause of the differences in renal function.

# RENAL FUNCTION AFTER PROLONGED SEVOFLURANE ANESTHESIA

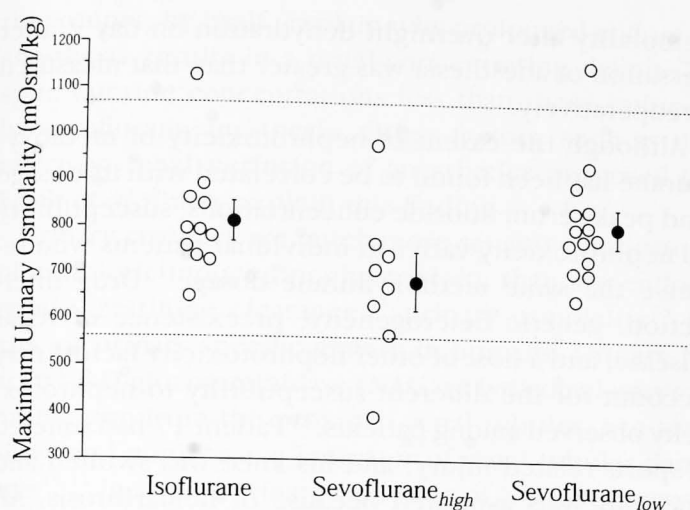

**Fig. 2.** Maximum urinary osmolality after injection of vasopressin in each patient (open circles). Ten units of aqueous vasopressin was administered 16.5 h after cessation of anesthesia. Closed circles and error bars represent mean  $\pm$  SE. Mean maximal urinary osmolalities in the isoflurane, sevoflurane<sub>high</sub>, and sevoflurane<sub>low</sub> groups were  $816 \pm 37$  (650–1125),  $681 \pm 60$  (390–980), and  $811 \pm 32$  (630–1158) mOsm/kg, respectively. The dotted line represents the range of the twice standard deviation from the mean of the isoflurane group. No significant differences were found among the three groups ( $P = 0.068$ ).

believe the effects of surgical trauma and hemorrhage on renal function in the current study were minimal and were probably the same in the three groups, because the sites of surgery in our healthy patients were almost always in the extremities, and blood loss was negligible. In addition, we made an effort to maintain stable hemodynamics. Because we used a Penlon vaporizer, which permits a maximum anesthetic concentration of 7%, we were able to administer higher concentrations of sevoflurane in the current study than in our previous study. We were, therefore, able to obtain patients whose peak inorganic fluoride concentration exceeded  $50 \mu\text{mol/l}$ .

The total dosage of anesthetic in the sevoflurane<sub>high</sub> group was significantly greater than that in the other two groups (table 1). However, when only those patients who underwent tourniquet inflation were considered, no significant difference was found among the three groups in total anesthetic dosage (table 3). Although MAC hours in the sevoflurane<sub>high</sub> group tended to be greater than in the other two groups, it is unlikely that poor renal perfusion caused by greater concentration of anesthetics occurred in the sevoflurane<sub>high</sub> group, because we adjusted individual anesthetic concentrations to maintain stable hemodynamics.

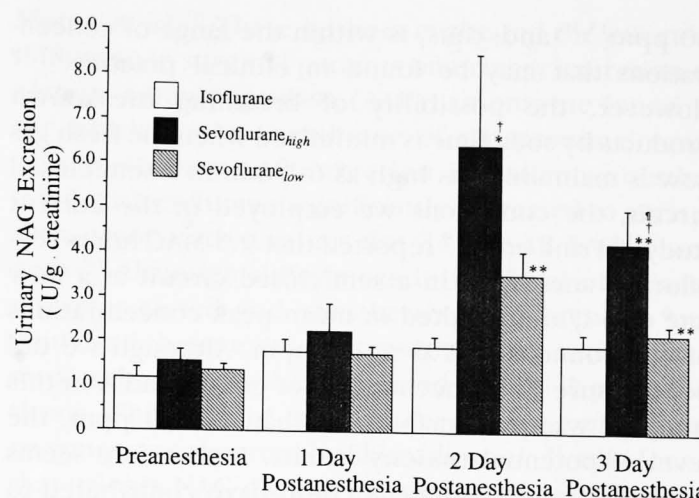

**Fig. 3.** Changes over time in urinary NAG excretion in the three groups. Urinary excretion of NAG in both the sevoflurane<sub>high</sub> and the sevoflurane<sub>low</sub> groups was significantly higher after than before anesthesia. Data points represent mean  $\pm$  SE. \* $P < 0.05$ ; \*\* $P < 0.01$  compared with each preoperative value. † $P < 0.05$  compared with the isoflurane group. ‡ $P < 0.05$  compared with the sevoflurane<sub>low</sub> group.

Soda lime, which was used in this study, converts sevoflurane to an olefin referred to as compound A,<sup>13,14</sup> which is nephrotoxic in rats.<sup>15,16</sup> The threshold of compound A for renal tubular necrosis in rats is 25–

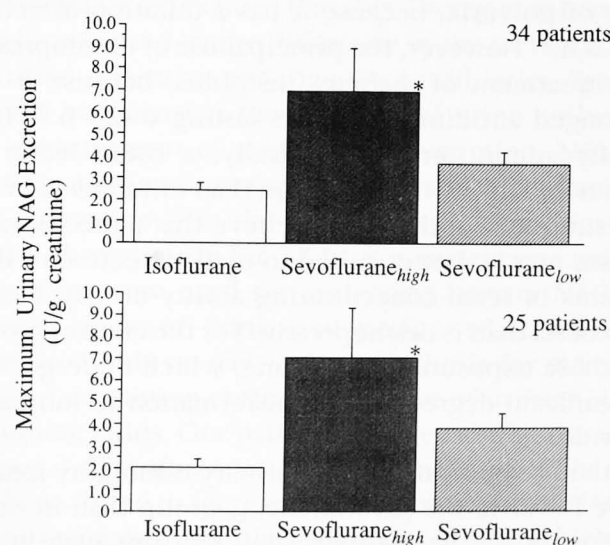

**Fig. 4.** Maximum urinary NAG excretion after anesthesia. (Top) With all patients included (34 patients), maximum urinary NAG excretion after anesthesia in the sevoflurane<sub>high</sub> group significantly differed from the isoflurane group ( $P < 0.05$ ). (Bottom) With patients limited to those who were administered cephalosporins and underwent tourniquet inflation (25 patients), a significant difference was also found in maximum urinary NAG excretion after anesthesia between the sevoflurane<sub>high</sub> and the isoflurane group ( $P < 0.05$ ).



50 ppm<sup>15,16</sup> and, thus, is within the range of concentrations that may be found in clinical practice.<sup>17,18</sup> However, the possibility of breathing breakdown products by soda lime is minimized when the fresh gas flow is maintained as high as 6 l/min in a semiclosed circuit, the conditions we employed in the current study.<sup>14</sup> Frink *et al.*<sup>19</sup> reported that 9.5 MAC hours sevoflurane anesthesia in a semiclosed circuit at a flow rate of 5 l/min resulted in mean peak concentrations of compound A of  $7.6 \pm 1.0$  ppm. Although we did not measure the concentration of compound A in this study, it was presumably less than 25–50 ppm, the level of potential toxicity in rats. It therefore seems unlikely that compound A could have contributed to production of the transient abnormalities in urinary concentrating ability and NAG excretion detected in this study.

Mazze *et al.*<sup>12</sup> and Frink *et al.*<sup>5</sup> compared responses to vasopressin or desmopressin before and after prolonged anesthesia in volunteers. We were unable to perform vasopressin tests before anesthesia because of limitations created by the length of the preoperative period of study. Overnight preoperative and postoperative urine-concentrating ability testing was, therefore, substituted for comparison of preoperative with postoperative urine-concentrating ability. Aqueous vasopressin is now widely used in the differential diagnosis of polyuria, because it has a duration of action of 2–6 h.<sup>20</sup> However, the principal use of desmopressin is in treatment of diabetes insipidus, because it has prolonged antidiuretic effects lasting 6–24 h.<sup>20</sup> It is usually administered intranasally, a route featuring greater variability in absorption than intramuscular administration. We therefore believe that aqueous vasopressin may be better suited to early detection of decrements in renal-concentrating ability on day 1 after anesthesia than is desmopressin. For the control group, we chose exposure to isoflurane, which undergoes an insignificant degree of biotransformation to inorganic fluoride.

Although mean maximum urinary osmolality tended to be lower in the sevoflurane<sub>high</sub> group than in other groups, power analysis revealed that our inability to detect a difference among the three groups probably resulted from a type II error. Patient 17, who had the lowest maximum urinary osmolality, appeared to have abnormal renal-concentrating ability, because his value was more than 3 SD less than the mean of the control isoflurane group. This patient's renal function returned to normal by 2 days after anesthesia, because urinary

osmolality after overnight dehydration on day 2 after cessation of anesthesia was greater than that measured preoperatively.

Although the extent of nephrotoxicity of methoxyflurane has been found to be correlated with its dosage and peak serum fluoride concentrations, susceptibility to nephrotoxicity varies in individual patients who receive the same methoxyflurane dosage.<sup>1</sup> Drug interaction, genetic heterogeneity, preexistence of renal disease, and a host of other nephrotoxicity factors may account for the different susceptibility to nephrotoxicity observed among patients.<sup>21</sup> Patient 17 had suffered a sports-related injury, and his knee was swollen and the joint was aspirated because of hemarthrosis. Although he had no signs of infection, he prophylactically received 600 mg cefotitam orally each day for 4 days before anesthesia. The results of preoperative renal function testing of patient 17 were normal, as confirmed by laboratory renal tests, an overnight urine-concentrating test, and determination of urinary excretion of NAG (table 1). Preoperative administration of antibiotics may have contributed to the difference in concentrating ability between patient 17 and the two other patients who had similar or greater peak fluoride concentrations (patients 13 and 16). Cephalosporins do not commonly have nephrotoxic effects at therapeutic doses, although they are potentially nephrotoxic.<sup>10,22,23</sup> Furthermore, patient 17 received only a low dose of cefotitam. Consequently, we believe it unlikely that preoperative administration of cefotitam contributed to the concentrating defect in patient 17, although we cannot exclude this possibility entirely.

In neither the study by Frink *et al.*<sup>5</sup> nor our own previous study<sup>6</sup> did any patient anesthetized with sevoflurane exhibit an abnormality in renal-concentrating ability. This may have been the case because of the difference in antidiuretic activity between desmopressin and aqueous vasopressin, and also because only one patient in our study and three patients in the study by Frink *et al.*<sup>5</sup> had a peak serum inorganic fluoride concentration greater than 50  $\mu\text{mol/l}$ . Mazze *et al.*<sup>12</sup> found that a decrease in maximum urinary osmolality occurred after injection of vasopressin tannate in every subject who had undergone prolonged anesthesia with enflurane, although the mean peak fluoride concentration was 33.6  $\mu\text{mol/l}$ . In the study by Frink *et al.*, prolonged enflurane anesthesia (9.5 MAC hours) produced a renal-concentrating deficit in two of seven subjects with mean fluoride concentrations of 26  $\mu\text{mol/l}$ . The shape of the time-concentration curve for serum fluo-

ride cannot, by itself, explain anesthesia results in a renal spite fluoride concentration by sevoflurane anesthesia. Frink *et al.*<sup>5</sup> may explain the effect on renal perfusion of

Urinary enzymes are much of antibiotic-induced nephro- enous creatinine clearance, rats, or urinary specific gravity acetyl- $\beta$ -D-glucosaminidase (originating from the proximal and noninvasive indication.<sup>10,11</sup> Increased urinary excretion in various renal diseases, in after surgery, and during renal transplantation.<sup>11</sup> U correlated most closely am the dose of antibiotic used. between the degree of excretion of concentrating ability papillary necrosis induced urinary excretion of NAG is a induced renal abnormalities in urinary excretion of NAG induced by surgery.<sup>11</sup> After activity does not increase to limit of normal.<sup>11</sup> Indeed, ratios for our patients anesthet not exceed twice the upper patients received antibiotic as aminoglycosides, have urinary NAG excretion.<sup>8,29</sup> I whether limb ischemia was increase in urinary excretion compared the urinary excretion patients who received cephalo- tourniquet inflation. Because NAG/creatinine ratio in the significantly greater than the even for this limited set of limb ischemia, type of surgery accounted for the increased excretion of NAG in the sev study.

It is of note that it was no days 2 and 3 postanesthesia fluoride ion concentrations that significant elevation occurred. This finding agree



# RENAL FUNCTION AFTER PROLONGED SEVOFLURANE ANESTHESIA

ride cannot, by itself, explain why prolonged enflurane anesthesia results in a renal-concentrating deficit despite fluoride concentrations less than those induced by sevoflurane anesthesia. Other factors, such as the effect on renal perfusion of anesthetics proposed by Frink *et al.*,<sup>5</sup> may explain this finding.

Urinary enzymes are much more sensitive indicators of antibiotic-induced nephrotoxicity than are endogenous creatinine clearance,<sup>24</sup> urinary osmolality<sup>25</sup> in rats, or urinary specific gravity in humans. Urinary N-acetyl- $\beta$ -D-glucosaminidase (NAG), a lysosomal enzyme originating from the proximal renal tubules, is a sensitive and noninvasive indicator of renal tubular damage.<sup>10,11</sup> Increased urinary excretion of NAG is observed in various renal diseases, in drug-induced renal damage, after surgery, and during episodes of rejection after renal transplantation.<sup>10,11</sup> Urinary excretion of NAG correlated most closely among urinary enzymes with the dose of antibiotic used.<sup>10</sup> Correlations were found between the degree of excretion of NAG and impairment of concentrating ability in dogs<sup>26</sup> and rats<sup>27</sup> with papillary necrosis induced by ethyleneimine. Thus, urinary excretion of NAG is a sensitive indicator of drug-induced renal abnormalities.<sup>10</sup> The extent of increase in urinary excretion of NAG is proportional to the stress induced by surgery.<sup>11</sup> After minor surgery, urinary NAG activity does not increase to more than twice the upper limit of normal.<sup>11</sup> Indeed, the urinary NAG/creatinine ratios for our patients anesthetized with isoflurane did not exceed twice the upper limit of normal. All of our patients received antibiotics. Cephalosporins, as well as aminoglycosides, have been reported to increase urinary NAG excretion.<sup>28,29</sup> In addition, we do not know whether limb ischemia was a factor responsible for the increase in urinary excretion of NAG. Therefore, we compared the urinary excretion of NAG only in those patients who received cephalosporins and underwent tourniquet inflation. Because the maximum urinary NAG/creatinine ratio in the sevoflurane<sub>high</sub> group was significantly greater than that in the isoflurane group, even for this limited set of patients, it is unlikely that limb ischemia, type of surgery, or antibiotic administration accounted for the increase in maximum urinary excretion of NAG in the sevoflurane<sub>high</sub> group in this study.

It is of note that it was not on day 1, but rather on days 2 and 3 postanesthesia, at which time the serum fluoride ion concentrations had returned to normal, that significant elevation of urinary NAG excretion occurred. This finding agrees with those obtained by

Motuz *et al.*<sup>30</sup> These authors evaluated the effect of enflurane in surgical patients on urinary excretion of alanine aminopeptidase (AAP), an enzyme found in the brush border membrane of the proximal renal tubule. Urinary AAP excretion in patients anesthetized with enflurane significantly increased to greater than preoperative values not 24 but 48 h after surgery.<sup>30</sup> Although differences in the kind of urinary enzymes tested and anesthetics used between our study and theirs exist, increased urinary excretion of renal tubular enzymes occurred on day 2 postanesthesia. This type of delay in the increase of urinary enzymes was reported by Shimada *et al.*,<sup>31</sup> who found that urinary NAG did not increase until 12 h, but was increased in 12–24-h urine specimens and reached a maximum value within 48 h after injection of inorganic mercury in rats. They suggested that the release of NAG into urine or significant lysosomal degradation occurred at a later time period than mercury damaged proximal tubules. These findings indicate that urinary enzymes in renal tubules do not increase immediately after the serum concentration of the toxin responsible for renal damage reaches a peak value, and that there is a delay in the increase of excretion of urinary enzymes in renal tubules.

In the study by Frink *et al.*,<sup>5</sup> the urinary NAG/creatinine ratio did not increase after prolonged sevoflurane anesthesia. We speculate that this discrepancy between results is caused by the difference in the methods used for urine collection and the use of antibiotics. Frink *et al.* did not mention the duration of urine collection for measurement of urinary NAG excretion. Notably, 24-h samples are best for precise evaluation of urinary NAG excretion.<sup>10</sup> In the current study, urine was collected continuously for 72 h after anesthesia, and 24-h samples were used for evaluating urinary NAG excretion. However, Frink *et al.* performed a 24-h urine collection only on day 4 after anesthesia for measurement of creatinine clearance and not of urinary NAG/creatinine ratios. Our patients received antibiotics until at least 3 days after anesthesia. Cephalosporin therapy has been found to increase urinary excretion of NAG.<sup>28</sup> In the current study, the isoflurane group, which received cephalosporins to an extent similar to the sevoflurane group, had no increase in NAG excretion during the 3-day postanesthesia period, indicating that that increases in urinary NAG excretion were caused by sevoflurane anesthesia. It is possible, however, that cephalosporins potentiated fluoride-induced renal damage, and that, as a result, urinary NAG excretion in both the

sevoflurane<sub>high</sub> and sevoflurane<sub>low</sub> groups significantly increased after anesthesia.

Our study demonstrates that sevoflurane administration was associated with a dose-related increase of urinary NAG excretion and a transient, significant defect in concentrating ability in one patient and the tendency toward a transient concentrating defect in a group of patients exposed to a high dose of sevoflurane. In these young, healthy patients without renal disease, the results were inconsequential. However, further studies will be required to establish the safety of sevoflurane anesthesia in patients with preexisting renal disease.

The authors thank the surgeons and nurses in the operating room and orthopedic wards of their hospitals, for their cooperation; Professor Kono, Department of Public Health, National Defense Medical College, for his assistance with statistical analysis; and R. Endo, for his assistance in measuring urinary N-acetyl- $\beta$ -glucosaminidase excretion.

## References

- Cousins MJ, Mazze RI: Methoxyflurane nephrotoxicity: A study of dose response in man. *JAMA* 225:1611-1616, 1973
- Kharasch ED, Thummel KE: Identification of cytochrome P450 2E1 as the predominant enzyme catalyzing human liver microsomal defluorination of sevoflurane, isoflurane, and methoxyflurane. *ANESTHESIOLOGY* 79:795-807, 1993
- Frink EJ Jr, Ghantous H, Malan TP, Morgan S, Fernando J, Gandolfi AJ, Brown BR Jr: Plasma inorganic fluoride with sevoflurane anesthesia: Correlation with indices of hepatic and renal function. *Anesth Analg* 74:231-235, 1992
- Kobayashi Y, Ochiai R, Takeda J, Sekiguchi H, Fukushima K: Serum and urinary inorganic fluoride concentrations after prolonged inhalation of sevoflurane in humans. *Anesth Analg* 74:753-757, 1992
- Frink EJ Jr, Malan TP Jr, Isner RJ, Brown EA, Morgan SE, Brown BR Jr: Renal concentrating function following prolonged sevoflurane or enflurane anesthesia in volunteers. *ANESTHESIOLOGY* 80:1019-1025, 1994
- Higuchi H, Arimura S, Sumikura H, Satoh T, Kanno M: Urine concentrating ability after prolonged sevoflurane anaesthesia. *Br J Anaesth* 73:239-240, 1994
- Scheller MS, Saidman LJ, Partridge BL: MAC of sevoflurane in humans and the New Zealand white rabbit. *Can J Anaesth* 35:153-156, 1988
- Stevens WC, Dolan WM, Gibbons RT, White A, Eger EI II, Miller RD, de Jong RH, Elashoff RM: Minimum alveolar concentration (MAC) of isoflurane with and without nitrous oxide in patients of various ages. *ANESTHESIOLOGY* 42:197-200, 1975
- Noto A, Ogawa Y, Mori S, Yoshioka M, Kitakaze T, Hori T, Nakamura M, Miyake T: Simple, rapid spectrophotometry of urinary N-acetyl-B-D-glucosaminidase, with use of a new chromogenic substrate. *Clin Chem* 29:1713-1716, 1983
- Price RG: Urinary enzymes, nephrotoxicity and renal disease. *Toxicology* 23:99-134, 1982
- Kind PRN: N-acetyl-B-D-glucosaminidase in urine of patients with renal disease, and after renal transplants and surgery. *Clin Chim Acta* 119:89-97, 1982
- Mazze RI, Calverley RK, Smith NT: Inorganic fluoride nephrotoxicity: Prolonged enflurane and halothane anesthesia in volunteers. *ANESTHESIOLOGY* 46:265-271, 1977
- Wallin RF, Regan BM, Napoli MD, Stern IJ: Sevoflurane: A new inhalational anesthetic agent. *Anesth Analg* 54:758-765, 1975
- Hanaki C, Fujii K, Morio M, Tashima T: Decomposition of sevoflurane by soda lime. *Hiroshima J Med Sci* 36:61-67, 1987
- Gonsowski CT, Laster MJ, Eger EI II, Ferrell LD, Kerchmann RL: Toxicity of compound A in rats: Effect of a 3-hour administration. *ANESTHESIOLOGY* 80:556-565, 1994
- Gonsowski CT, Laster MJ, Eger EI II, Ferrell LD, Kerchmann RL: Toxicity of compound A in rats: Effect of increasing duration of administration. *ANESTHESIOLOGY* 80:566-573, 1994
- Frink EJ Jr, Malan TP, Morgan SE, Brown EA, Malcomson M, Brown BR Jr: Quantification of the degradation products of sevoflurane in two CO<sub>2</sub> absorbents during low-flow anesthesia in surgical patients. *ANESTHESIOLOGY* 77:1064-1069, 1992
- Bito H, Ikeda K: Plasma inorganic fluoride and intracircuit degradation product concentrations in long-duration, low-flow sevoflurane anesthesia. *Anesth Analg* 79:946-951, 1994
- Frink EJ Jr, Isner RJ, Malan TP, Morgan SE, Brown EA, Brown BR Jr: Sevoflurane degradation product concentrations with soda lime during prolonged anesthesia. *J Clin Anesth* 6:239-242, 1994
- Andreoli TE: The posterior pituitary. Cecil's Textbook of Medicine, 19th edition. Edited by Wyngaarden JB, Smith LH Jr, Bennett JC. Philadelphia, W.B. Saunders, 1992, pp 1239-1246
- Baden JM, Rice SA: Metabolism and toxicity, Anesthesia, 3rd edition. Edited by Miller RD. New York, Churchill Livingstone, 1990, pp 135-170
- Appel GB, Neu HG: The nephrotoxicity of antimicrobial agents. *N Engl J Med* 296:663-670, 722-728, 1977
- Barza M: The nephrotoxicity of cephalosporins: An overview. *J Infect Dis* 137(suppl):60-73, 1978
- Luft FC, Patel V, Yum MN, Patel B, Kleit SA: Experimental aminoglycoside nephrotoxicity. *J Lab Clin Med* 86:213-220, 1975
- Rankin LI, Luft FC, Yum MN, Sloan RS, Dinwiddie CB, Isaacs LL: Comparative nephrotoxicity of SCH 21420 and amikacin in rats. *Antimicrob Agents Chemother* 16:491-494, 1979
- Ellis BG, Price RG, Topham JC: The effect of papillary damage by ethyleneimine on kidney function and some urinary enzymes in the dog. *Chem Biol Interact* 7:131-141, 1973
- Ellis BG, Price RG: Urinary enzyme excretion during renal papillary necrosis induced in rats with ethyleneimine. *Chem Biol Interact* 11:473-482, 1975
- Gibey R, Dupond JL, Henry JC: Urinary N-acetyl-beta-D-glucosaminidase (NAG) isoenzyme profiles: A tool for evaluating nephrotoxicity of aminoglycosides and cephalosporins. *Clin Chim Acta* 137:1-11, 1984
- Naruse T, Hirokawa N, Oike S, Maekawa T: Clinical evaluation of urinary N-acetyl-beta-D-glucosaminidase activity in patients receiving aminoglycoside and cephalosporin drugs. *Res Commun Chem Pathol Pharmacol* 31:313-329, 1981
- Motuz DJ, Watson WA, Barlow JC, Velasquez NV, Schentag JJ: The increase in urinary alanine aminopeptidase excretion associated with enflurane anesthesia is increased further by aminoglycosides. *Anesth Analg* 67:770-774, 1988
- Shimada H, Kiyozumi M, Kojima S: Effect of N-benzyl-D-glucamine duthiocarbamate on renal toxicity of inorganic mercury in rats. *Chem Pharm Bull (Tokyo)* 38:1429-1431, 1990

## Biopharmaceutics Fentanyl Device

Pierre Fiset, M.D., F.R.C.P.C.,\*  
Steven L. Shafer, M.D.†

**Background:** Compared with other potent analgesics, the postoperative administration of fentanyl offers a noninvasive delivery. The transdermal fentanyl, the Duragesic, in preventable patient deaths, analgesia and is contraindicated for operative pain. We examined the transdermal fentanyl device intended for use as a postoperative analgesic. The new formulation offers pharmacokinetics that might permit safe use in postoperative patients. Patients received 500 µg as part of the induction of anesthesia. Concentrations were measured over the first postoperative day, of fentanyl, a transdermal fentanyl upper torso of the patient for 2

\* Assistant Professor, Department of

† Research Nurse, Department of Veterans Affairs Medical Center

‡ Resident, Department of Anesthesiology and Medicine

§ Graduate Student, Department of Anesthesiology

|| Staff Anesthesiologist, Palo Alto Medical Center; Assistant Professor, Stanford University School of Medicine

Received from the Department of Anesthesiology, Université de Montréal, Québec, Canada; the Department of Veterans Affairs Medical Center, Palo Alto, California; the Department of Anesthesiology, Stanford University School of Medicine, Stanford, California; and the Department of Anesthesiology, University of Oregon, Eugene, Oregon.

August 8, 1994. Accepted for publication in part by the Merit Review Program.

Address reprint requests to Dr. Fiset, Royal Victoria Hospital, 687 Pine Street, Vancouver, B.C. V8V 2G6, Canada.

Address reprint requests to Dr. Shafer, Royal Victoria Hospital, 687 Pine Street, Vancouver, B.C. V8V 2G6, Canada.

Address reprint requests to Dr. Shafer, Royal Victoria Hospital, 687 Pine Street, Vancouver, B.C. V8V 2G6, Canada.

Address reprint requests to Dr. Shafer, Royal Victoria Hospital, 687 Pine Street, Vancouver, B.C. V8V 2G6, Canada.

Address reprint requests to Dr. Shafer, Royal Victoria Hospital, 687 Pine Street, Vancouver, B.C. V8V 2G6, Canada.

Address reprint requests to Dr. Shafer, Royal Victoria Hospital, 687 Pine Street, Vancouver, B.C. V8V 2G6, Canada.

Address reprint requests to Dr. Shafer, Royal Victoria Hospital, 687 Pine Street, Vancouver, B.C. V8V 2G6, Canada.

Address reprint requests to Dr. Shafer, Royal Victoria Hospital, 687 Pine Street, Vancouver, B.C. V8V 2G6, Canada.

Address reprint requests to Dr. Shafer, Royal Victoria Hospital, 687 Pine Street, Vancouver, B.C. V8V 2G6, Canada.

Address reprint requests to Dr. Shafer, Royal Victoria Hospital, 687 Pine Street, Vancouver, B.C. V8V 2G6, Canada.

Address reprint requests to Dr. Shafer, Royal Victoria Hospital, 687 Pine Street, Vancouver, B.C. V8V 2G6, Canada.

Address reprint requests to Dr. Shafer, Royal Victoria Hospital, 687 Pine Street, Vancouver, B.C. V8V 2G6, Canada.
